# Supplementary material for: Transmembrane redox control and proteolysis of PdeC, a novel type of c‐di‐GMP phosphodiesterase
Source: PubMed Central journal article supplement — EMBO J. 2018 Mar 7;37(8):e97825. doi: 10.15252/embj.201797825 (PMC5897775; doi:10.15252/embj.201797825), 2018-03-07
Supplement: EMBJ-37-e97825-s001.pdf [file EMBJ-37-e97825-s001.pdf]

# Appendix / Supplementary Information

## Transmembrane redox control and proteolysis of PdeC, a novel type of c-di-GMP phosphodiesterase

Susanne Herbst, Martin Lorkowski, Olga Sarenko, T. Kim L. Nguyen, Tina Jaenicke  
and Regine Hengge\*

Institut für Biologie / Mikrobiologie, Humboldt-Universität zu Berlin, 10115 Berlin, Germany

### Contents

#### 1. Supplementary Materials & Methods

#### 2. Supplementary Figures:

- Fig. S1: Amino acid sequence alignment of the five CSS domain PDEs of *E. coli* K-12
- Fig. S2: Macrocolony morphology as an indicator of biofilm matrix composition
- Fig. S3: Complete amino acid sequence of PdeC and relevant sequence of LacY
- Fig. S4: Association of the different PdeC variants and fragments with membrane and soluble cell fractions
- Fig. S5: Single cysteine variants of PdeC dimerize by forming intermolecular DSBs
- Fig. S6: Point mutations between amino acids 207 and 222 in the CSS domain do not affect proteolysis of PdeC<sup>ASS</sup>
- Fig. S7: The PdeC<sup>wt</sup>-derived 33 kDa processed fragment in a *dsbA* mutant is generated by DegP/DegQ
- Fig. S8: TM1 of PdeC is not a cleavable signal sequence
- Fig. S9: Two-hybrid interaction assays with PdeC derivatives in which TM2 was precisely replaced by the second transmembrane segment of LacY (TM2\*)
- Fig. S10: Mutations in *pdeC* or multiple knockouts of genes encoding CSS domain PDEs do not affect matrix distribution or structure in the young outer rim areas of macrocolony biofilms
- Fig. S11: CSS domain PDEs modulate matrix production and architecture in deeper zones of mature macrocolony biofilms

#### 3. Supplementary Tables (Oligonucleotides)

#### 4. Supplementary References

## Supplementary Materials & Methods

### ***Bacterial strains***

All strains used are derivatives of the *E. coli* K-12 strain W3110 (Hayashi et al., 2006). The *pdeB(ylaB)::cat*, *pdeC(yjcC)::kan*, *pdeD(yoaD)::cat*, *pdeG(ycgG)::kan*, *pdeH(yhjH)::kan*, *pdeN(rtn)::kan* and *csgB::kan* mutations are full ORF deletion( $\Delta$ )/resistance cassette insertions previously described (Sommerfeldt et al., 2009). For generating the *cya::kan*, *degP::kan*, *degQ::kan*, *dsbA::kan*, *dsbB::kan*, *dsbC::kan*, *dsbD::kan*, *dsbG::kan* and  $\Delta(lacI-A)::kan$  full ORF deletion/insertion mutants, the one-step-inactivation protocol was applied (Datsenko and Wanner, 2000) using oligonucleotide primers listed in Table S1. Mutations associated with resistance cassettes were transferred by P1 transduction (Miller, 1972). When required (e.g. for combining multiple mutations), cassettes were flipped out (Datsenko and Wanner, 2000), which is designated as '*::scar*'.  $\Delta rpoS$ ,  $\Delta bcsA$  and  $\Delta csgD$  are such scarred derivatives of previously described full ORF deletion/*cat* cassette insertions (Pesavento et al., 2008; Serra et al., 2013; Weber et al., 2006). Strains carrying the previously described single copy *csgB::lacZ* reporter fusion (inserted at the att( $\lambda$ ) site) (Weber et al., 2006) also carried a  $\Delta(lacI-A)::scar$  deletion.

The introduction of point mutations into chromosomal genes was performed with a two-step method related to the one-step gene inactivation (Kolmsee and Hengge, 2011). All oligonucleotide primers are listed below in Table S1.

### ***Growth of bacterial macrocolonies***

Cells were grown overnight in liquid LB medium (Miller, 1972) under aeration at 37°C. 5  $\mu$ l of the overnight cultures were spotted on salt-free LB or YESCA agar plates (the latter containing 10 g/l casamino acids instead of tryptone as in LB). Agar plates were supplemented with Congo Red (CR, 40  $\mu$ g ml<sup>-1</sup>) and Coomassie brilliant blue (20  $\mu$ g ml<sup>-1</sup>) ('CR plates'). For growing plasmid-containing strains, 100  $\mu$ g ml<sup>-1</sup> ampicillin was included in the agar plates. In order to grow all strains to be compared in parallel on a single agar plate, 140 mm-diameter Petri dishes (VWR) were used, which allows the spotting of up to 25 macrocolonies in a 5x5 array on a single plate. Plates with macrocolonies were incubated at 28°C for 5 days.

### ***Construction of low copy number plasmids expressing wildtype and mutant variants of PdeC***

The plasmids used in this study were constructed using the low copy number vector pCAB18, which carries the *tac* promoter followed by a multiple cloning site (Barembuch and Hengge, 2007). C-terminal His6 tags fused to the PdeC variants were introduced via the oligonucleotide primers used for PCR. Oligonucleotides used in this study are listed in Table S1 (see below). Point mutations were introduced by a two-step-PCR protocol. Four primers were used, with two introducing the mutation and the others flanking the up- and downstream regions of the gene and carrying restriction sites for cloning into pCAB18. In the first step, two separate PCR fragments were generated that overlap in the region of the mutation and cover the up- and downstream regions, respectively. In the second step these fragments were used in combination as templates for a PCR reaction with the up- and downstream primers only in order to generate the final PCR fragment. This fragment contains the entire gene carrying the mutation flanked by the restriction sites for cloning, which was then inserted into the vector. A similar two-step PCR protocol was used to generate the pdeC/N chimeric construct (consisting of TM1-CSS domain-TM2 of PdeC followed by the EAL domain of PdeN) with the exception that the two 'internal' primers used in the first PCR reactions determined the fusion site.

Cloning of pdeC<sup>Aperi</sup>, i.e. the PdeC variant that lacks the region encoding the periplasmic domain of PdeC (from T44 to R234), was performed by using a fully synthetic DNA fragment (obtained from GeneArt® Strings, Invitrogen) that also contained the restriction sites necessary for digestion and ligation into the vector pCAB18.

For replacing transmembrane regions TM1 and/or TM2 in PdeC (expressed from pCAB18) by the first and/or second transmembrane segments of LacY (see Fig. S2 for exact amino acid sequences substituting for each other), synthetic DNA fragments (obtained from GeneArt® Strings, Invitrogen) were used (for sequences, see Table S2). The fragments contained either the entire *pdeC* gene or only the 5'-region of *pdeC* (both with the necessary sequence substitutions). The fragments were amplified by PCR, thereby also introducing the *EcoRI* site directly upstream of the *pdeC* start codon (in a similar configuration also used for cloning of all other *pdeC* alleles). The subsequent cloning into pCAB18 made use of this *EcoRI* site as well as of the *EagI* and *EcoRV* sites naturally located between and after the DNA regions encoding the two transmembrane regions, respectively. The replacement of TM2 by TM2\* in various PdeC hybrid proteins expressed from pKNT25 and pUT18 essentially followed a two-step PCR mutagenesis protocol as described above (for primer sequences, see Table S1). For the first two PCR reactions, primer pairs *pdeC*<sup>wt</sup>-XbaI-for/TM2\*-rev and TM2\*-for/*pdeC*<sup>wt</sup>-SmaI-rev were used and the resulting two DNA fragments (overlapping in the TM2\* region)

were used for the second step PCR with the 'external' primer pair *pdeC<sup>wt</sup>*-XbaI-for/ *pdeC<sup>wt</sup>*-SmaI-rev to generate the full size *pdeC<sup>wt/TM2\*</sup>* or *pdeC<sup>ASS/TM2\*</sup>* fragments to be cloned into pKNT25 and pUT18. For cloning the region encoding TM2\*+EAL into pKNT25 and pUT18, the primer pair *pdeC<sup>TM2\*EAL</sup>*-XbaI-for/ *pdeC<sup>wt</sup>*-SmaI-rev was used, with the former encoding a new N-terminus followed by the complete TM2\* and the six codons of *pdeC* that follow its natural TM2.

The PdeC<sup>EALAC</sup> variant (containing C285S, C299S and C489S exchanges), was generated by using a synthetic DNA fragment (obtained from GeneArt® Strings, Invitrogen) that contained the 3'-region of *pdeC* with mutations resulting in these cysteine replacement and followed by a His6 tag-encoding region. This fragment was used to replace the corresponding region in the pCAB18 derivative already carrying *pdeC<sup>wt</sup>*, by making use of the natural *EagI* restriction site in *pdeC* and the *HindIII* restriction site downstream of *pdeC* (originating from the multiple cloning site) were used.

#### ***Detection of protein-protein interaction in vivo using a bacterial two-hybrid system.***

In order to detect *in-vivo* dimerisation of proteins and interactions with other proteins, the adenylate cyclase-based bacterial two-hybrid system was used (Karimova et al., 1998). This approach is based on the reconstitution of adenylate cyclase (CyaA) activity from two fragments (T25, T18) fused to two potentially interacting proteins. The hybrid proteins were expressed from plasmids (derived from the vectors pKNT25 and pUT18) that were transformed into *Δcya::scar* or *Δcya::scar ΔdegP::scar ΔdegQ::scar* derivatives of *E. coli* K-12 strain W3110. These *cya* mutants are unable to produce cAMP and utilize maltose as a carbon source on MacConkey agar base medium (white colonies). Interaction of the plasmid-encoded hybrid proteins in co-transformants generates a *cya<sup>+</sup>* phenotype (red colonies; these were obtained by spotting 5 μl of a 50 μl liquid suspension in 0.9 % NaCl of co-transformants onto MacConkey plates supplemented with 1% maltose, 100 μl/ml ampicillin and 50 μl/ml kanamycin and growth for 24-48 h growth at 28°C). Only when indicated, 0.05mM IPTG was added. In all constructs used in this study, the T25 and T18 fragments were fused to the C-termini of the PdeC protein variants.

#### ***SDS polyacrylamide gel electrophoresis and immunoblot detection***

For immunoblot analyses samples were taken in the postexponential phase (pe; i.e. at an OD<sub>578</sub> of approximately 3) and from overnight cultures grown in LB medium. Samples corresponding to 120 μg of total cellular protein were precipitated with 10% trichloroacetic

acid (TCA). The protein pellets were resuspended in 60  $\mu$ l of SDS-PAGE sample buffer without DTT and incubated for 10 min at 70°C and 95°C, respectively. Samples (15  $\mu$ l) were run on 12% SDS-polyacrylamid gels. In cases where the apparent sizes of proteins had to be compared, total protein content of the samples was adjusted to yield similar amounts of the relevant proteins. Proteins were detected by immunoblotting as previously described (Lange and Hengge-Aronis, 1994) using antibodies against CsgD (custom-made by Pineda Antikörper Service), His6-tag (Bethyl Laboratories, Inc.) or Flag tag (Sigma). Anti-rabbit or anti-mouse IgG horseradish-peroxidase conjugate from donkey (GE Healthcare) was used for protein visualization in the presence of Western Lightning<sup>®</sup> Plus-ECL enhanced chemiluminescence substrate (PerkinElmer). Standard protein size markers were obtained from Thermo Scientific.

### ***Separation of soluble and membrane-associated proteins***

In order to obtain soluble and membrane fractions of cellular extracts, 200  $\mu$ l of bacterial cultures grown overnight at 28°C were added to 1 ml 0.1 M NaOH (freshly diluted from a 10 M stock solution). Further sample preparation was performed according to an established protocol (Russel and Model, 1982).

### ***Overproduction and purification of PdeC variants and other proteins.***

C-terminally His6-tagged versions of PdeC<sup>wt</sup>, PdeC<sup>EALAC</sup> and PdeC/N were purified from pCAB18-derived plasmids in the W3110 strain carrying *degP::scar*, *degQ::scar* double mutations in order to minimize the proteolytic procession of the desired purified proteins. Strains were grown in LB/ampicilline at 28°C to an OD<sub>578</sub> of 0.5 to 0.7, IPTG (0.1 mM) was added and incubation continued for 5h at 28°C. Cells were harvested and lysed by three passages through a French press. Membrane proteins were purified essentially as described (Hebbeln et al., 2007) with minor variations. Cell debris was pelleted by centrifugation at 5000 rpm for 20 min. Membranes were pelleted by ultracentrifugation at 36000 rpm for 90 min, resuspended and homogenized in 50 mM Tris-HCl (pH 7.5), 10 mM MgCl<sub>2</sub> and 300 mM NaCl with protease inhibitor (cOmplete Tablets, Roche) and solubilized in the presence of 2 % (wt/vol) n-dodecyl  $\beta$ -D-maltoside (DDM; Sigma Aldrich) and 5 % (vol/vol) glycerol under agitation at 4°C for 2 hours. Nonsolubilized material was pelleted by ultracentrifugation. The supernatant containing the solubilized membrane fraction was used for protein purification. Imidazole was added to a final concentration of 20 mM and the solution was incubated with Ni-NTA (Protiono Ni-NTA Agarose, Macherey-Nagel) overnight. The whole solution was

transferred onto chromatography columns (Bio Rad) and washed with 50 mM Tris-HCl (pH 7.5) containing 0.05% DDM, 5% glycerol, 300 mM NaCl, 10 mM MgCl<sub>2</sub>, protease inhibitor and imidazole up to 20 mM. Proteins were eluted by addition of 250 mM imidazole. For the PDE-assay the buffer was exchanged to 25 mM Tris-HCl pH 8, 10 mM MgCl<sub>2</sub>, 100 mM NaCl and 5 % glycerol using PD-10 columns (GE Healthcare). Purified protein was concentrated by Amicon Ultra-4 centrifugal filters (30000 NMWL; Merck Millipore). Relative approximate concentrations of the purified PdeC and its variants were controlled by SDS polyacrylamide gel electrophoresis with marker proteins at standardized concentrations (Amersham Low Molecular Weight Calibration Kit for SDS Electrophoresis, GE Healthcare). Samples were stored at -80°C.

The soluble *E. coli* PDE PdeH was purified as previously described (Lindenberg et al., 2013) and was used for producing the control spot of radiolabeled pGpG for thin-layer chromatography.

### **Reconstitution of PdeC and PDE activity assays in lipid bilayer nanodiscs.**

For the reconstitution of His6-tagged variants of PdeC into nanodiscs, we followed previously published protocols (Inagaki et al., 2013; Ritchie et al., 2009) with some variations. 12.5 mg of chloroform-solubilized *E. coli* total lipid extract (Avanti Polar Lipids) was vacuum dried. Lipids were subsequently hydrated by the addition of ND buffer (20 mM Tris pH 7.5; 100 mM NaCl) and DDM (0.01 % final concentration) followed by 5-10 min of sonification. Purified membrane scaffold protein MSP1E3D1 and purified PdeC, PdeC<sup>EALΔC</sup> and PdeC/N, respectively, were added to the solubilized lipids, resulting in equimolar ratios of between scaffold protein and the PdeC variants (all at final concentrations of 3 μM). Samples were incubated for 1 h at 4°C and the detergent was removed using 1.5 g wet SM-2 Biobeads (Biorad, equilibrated in ND buffer) per 5 ml volume. As the membrane protein storage buffer contains 10% glycerol, which interferes with nanodisc-formation, ND buffer was added until glycerol concentration was below 3%. To prevent lipid-oxidation, samples were covered with N<sub>2</sub> gas. After 2 h of incubation at 4°C, ND buffer containing the nanodiscs was separated from the beads and incubated with Ni-NTA agarose (Protion Ni-NTA Agarose, Macherey-Nagel) overnight. Purification of nanodiscs with incorporated PdeC variants was performed as described for purification of PdeC proteins except for the absence of detergent and protease-inhibitor. Purified nanodiscs were concentrated by Amicon Ultra-4 centrifugal filters (10000 NMWL; Merck Millipore). Relative approximate concentrations of the scaffold protein and PdeC in the nanodiscs were controlled by SDS polyacrylamide gel electrophoresis with

marker proteins at standardized concentrations (Amersham Low Molecular Weight Calibration Kit for SDS Electrophoresis, GE Healthcare). Ratios between PdeC variants and scaffold protein (two molecules of which are required to form a nanodisc) varied between 0.5 and 1, i.e. preparations contained a mixture of nanodiscs with one and two molecules of the PdeC variants. Nanodisc preparations were stored at 4°C no longer than 7 days.

PDE activity of PdeC and its variants reconstituted in nanodiscs were performed as described (Weber et al., 2006) with [ $\alpha$ -<sup>32</sup>P]-c-di-GMP (Hartmann Analytic) as a substrate. Protein concentration in the assay was 57 nM and, where indicated, 6.5 mM DTT was added to the reactions. Samples were taken at 30, 60, 90 and 120 min and were analysed by thin layer chromatography and phosphoimaging (Thyphoon FLA-7000, Fuji). To generate the control spot of 5'-pGpG on thin-layer chromatographs, the PDE assay was performed with a purified soluble PDE, i.e. PdeH from *E. coli* K-12 (900 nM in the assay, 30 min reaction time).

### **Cryosectioning of macrocolony biofilms and fluorescence microscopy.**

The procedure and materials used for cryomicrotomy of macrocolony biofilms and to examine and visualize the fluorescence of Thioflavin S (TS), which binds to both amyloid curli fibres and cellulose, in cryosections have been described in detail (Serra and Hengge, 2017). Briefly, cryomicrotomy was performed using an HM560 Cryostat (Thermo Fisher Scientific) set at -20 °C. Disposable Sec35 blades (Thermo Fisher Scientific) were used to obtain five-micrometer-thick sections perpendicular to the plane of macrocolonies. ProLong 9 Gold antifade reagent (Invitrogen, Carlsbad, CA) was added to the slides as a mounting medium. For fluorescence microscopy, an Axio Observer.Z1 microscope (Zeiss) was used with the following filter configurations for Thioflavin S: excitation = 436 bp/20nm and emission = 535 bp/30nm. Samples were visualized at 630X magnification. All digital images were captured using an AxioCam 506 mono digital camera coupled to the Axio Observer.Z1 microscope and Zen 2 software (Zeiss). When indicated, fluorescence images were superimposed with the corresponding phasecontrast images to show the location of fluorescence on the macrocolony sections. All cryosectioning and fluorescence microscopy experiments were done in two biological replicates.





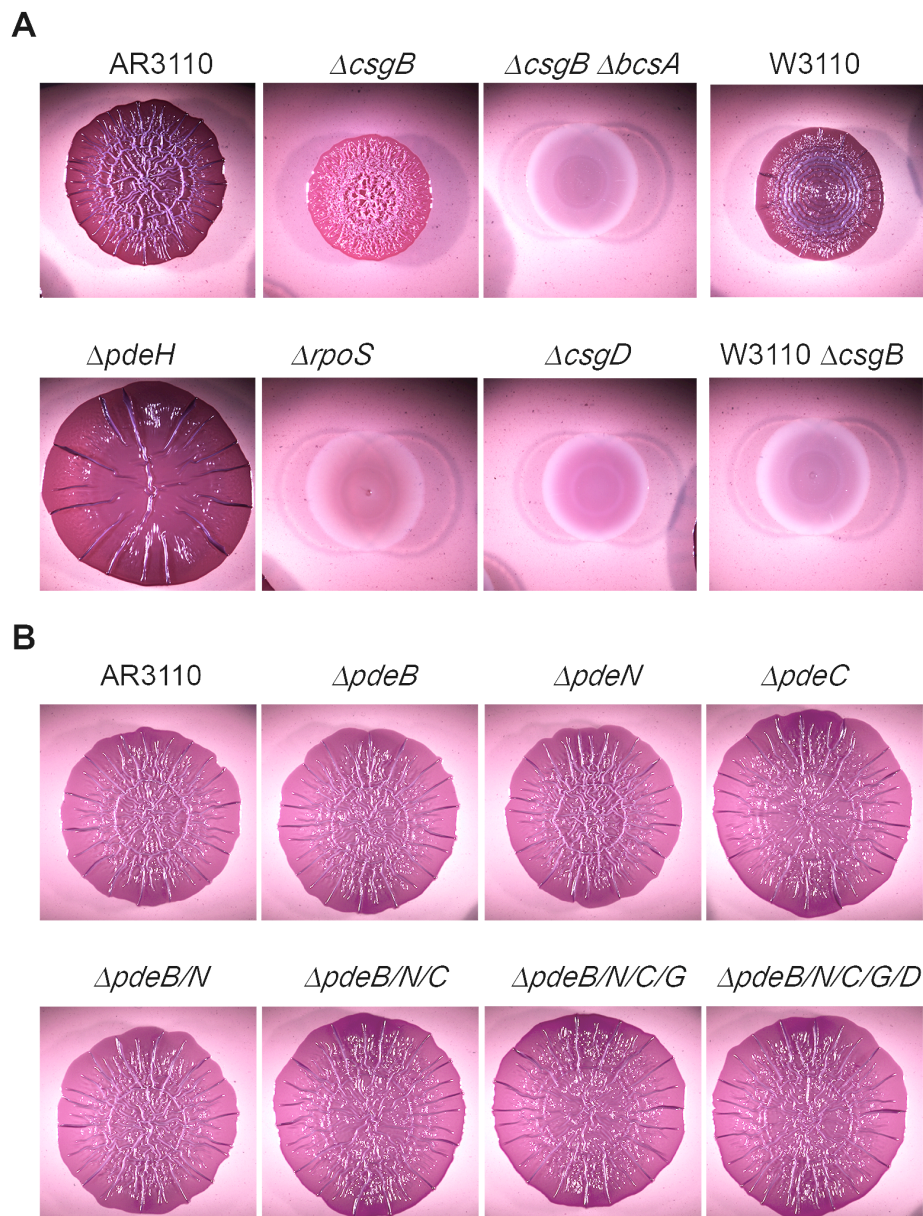

**Figure S2. Macrocolony morphology as an indicator of biofilm matrix composition.**

**A:** The *E. coli* K-12 strain AR3110 produces curli fibres as well as cellulose which results in large flat macrocolonies with ridges and wrinkles. Characteristic changes of macrocolony morphology are observed in strains that do not produce curli fibres (AR3110  $\Delta csgB$ ) or cellulose (W3110) or in the absence of the major cellular PDE PdeH (YhjH). The increased cellular c-di-GMP level in the *pdeH* mutant leads to increased expression of the biofilm regulator CsgD, which results in enhanced biosynthesis of both curli and cellulose, which generates very flat and stiff macrocolonies that only occasionally buckle up into long and very high ridges. Mutants that lack the RpoS sigma subunit of RNA polymerase or CsgD as well as a W3110 derivative in which also curli production is eliminated are completely devoid of extracellular matrix components and form white unstructured macrocolonies just as the *csgB bcsA* double mutant.

**B:** Macrocolony morphology of the AR3110 derivatives carrying single or multiple knockout mutations in genes encoding CSS domain-containing PDEs.

## PdeC

```
1   MSHRARHQLL ALPGIIFLVL FPIILSLWIA FLWAKSEVNN QLRTFAQLAL   50
51  DKSELVIRQA DLVSDAERY QGQVCTPAHQ KRMLNIIRGY LYINELIYAR 100
101 DNHFLCSSLI APVNGYTIAP ADYKREPNS IYYYRDTFFF SGYKMTYMQR 150
151 GNVAVINPL FWSEVMSDDP TLQWGVYDTV TKTFFSLSKE ASAATFSPLI 200
201 HLKDLTVQRN GYLYATVYST KRPIAAIVAT SYQRLITHFY NHLIFALPAG 250
251 ILGSLVLLLL WLRIRQNYLS PKRKLQRALE KHQLCLYYQP IIDIKTEKCI 300
301 GAEAILRWPG EQGQIMNPAE FIPLAEKEGM IEQITDYVID NVFRDLGDYL 350
351 ATHADRYVSI NLSASDFHTS RLIARINQKT EQYAVRPQOI KFEVTEHAFI 400
401 DVDKMTPIIL AFRQAGYEVA IDDFGIGYSN LHNLKSLNVD ILKIDKSFVE 450
451 TLTTHKTSHL IAEHIIELAH SLGLKTIAEG VETEEQVNWL RKRGVRYCQG 500
501 WFFAKAMPPQ VFMQWMEQLP ARELTRGQ
```

## LacY (N-terminus only)

```
1   MYYLKNTNFW MFGLEFFFFYF FIMGAYFPFF PIWLHDINHI SKSDTGIIFA   50
51  AISLFSLLFQ PLFGLLSDKL GLRK...
```

**Figure S3. Complete amino acid sequence of PdeC and relevant sequence of LacY.** The transmembrane segments of PdeC, i.e. TM1 (Q8 – A34) and TM2 (L235 – L262) as well as the N-terminal two transmembrane segments of LacY (N8 – L34) and (G46 – S67) are highlighted in grey. In various PdeC derivatives TM2 was precisely replaced by the second transmembrane segment of LacY (termed TM2\*). The amino acids eliminated by a large deletion of the periplasmic loop domain in PdeC<sup>Aperi</sup> are underlined. Cysteine residues in PdeC are highlighted in yellow, with C75 and the CSS motif in the periplasmic loop also highlighted in boldface. The EAL motif characteristic for PDEs is highlighted in red. Basic and acidic amino acids are labeled in blue and red, respectively.

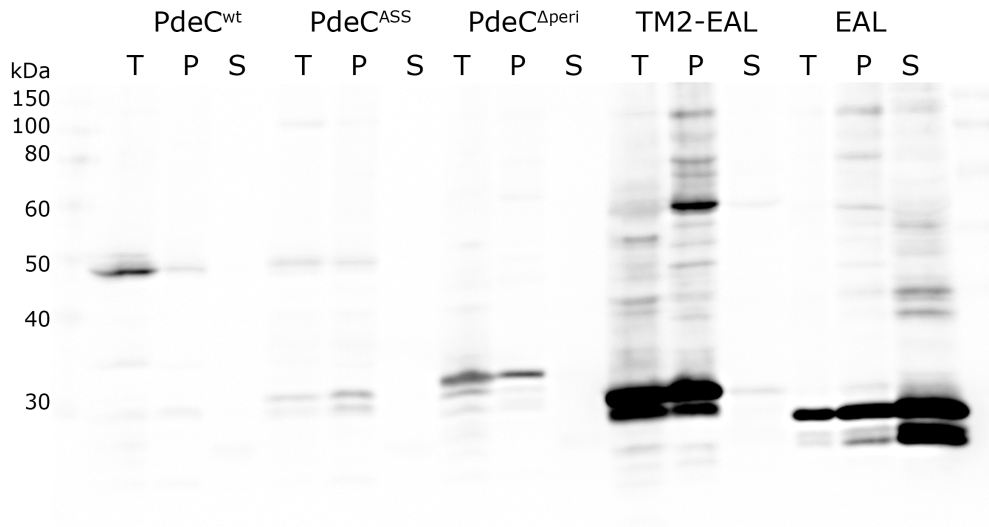

**Figure S4. Association of the different PdeC variants and fragments with membrane and soluble cell fractions.** Derivatives of strain W3110 expressing PdeC variants with the indicated mutations from pCAB18-derived plasmids were grown in LB medium at 28°C. Samples corresponding to 80  $\mu$ g total cellular protein were taken from overnight cultures. After NaOH treatment (see Supplemental methods described above), total samples (T) were fractionated into membrane protein-containing pellet (P) and soluble protein-containing supernatant (S) fractions, with proteins visualized by SDS-PAGE and immunoblotting (making use of the C-terminal His6 tag of all constructs). Note that the minor fraction of the soluble EAL domain that is found in the pellet fraction, most likely represents protein present in a minority of whole cells not destroyed by NaOH treatment that are found in the pellet fraction.

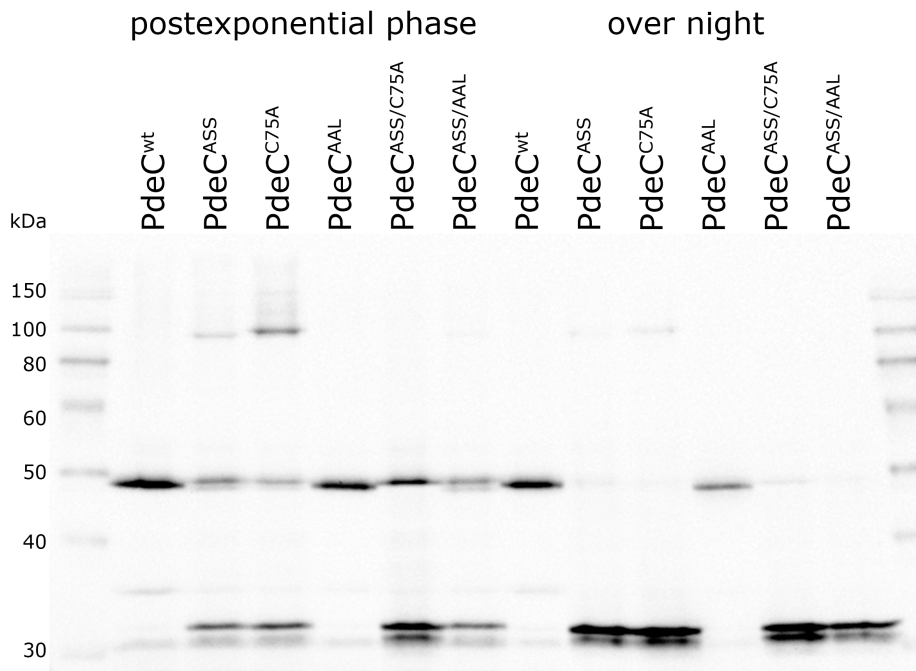

**Figure S5. Single cysteine variants of PdeC dimerize by forming intermolecular DSBs.** Derivatives of strain W3110 expressing PdeC variants with the indicated mutations from pCAB18-derived plasmids were grown in LB medium at 28°C and samples were taken at OD<sub>578</sub> of 2.8 and from overnight cultures. PdeC variants were detected by immunoblotting. Note that dimers are not formed by the PdeC variant that lacks *both* cysteins in the periplasmic domain. Moreover, in overnight cultures of strains expressing PdeC<sup>ASS</sup> and PdeC<sup>C75A</sup>, the 33 kDa fragment accumulates at the expense of the dimers, indicating that the intermolecular DSB is resolved, which allows the degradation to the 33 kDa fragment.

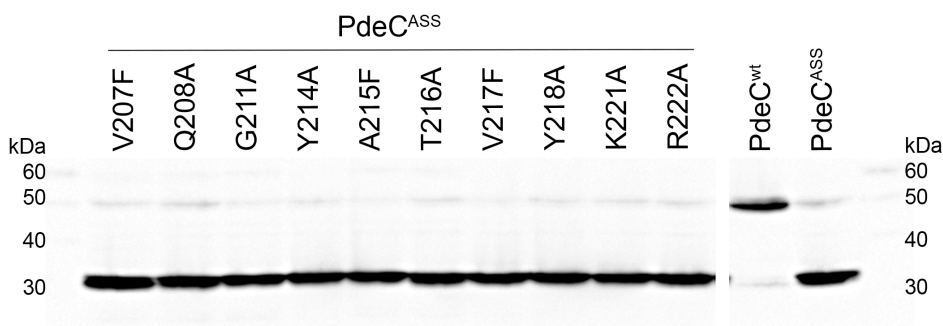

**Figure S6. Point mutations between amino acids 207 and 222 in the CSS domain do not affect proteolysis of PdeC<sup>ASS</sup>.** Single amino acid exchanges in the periplasmic region of PdeC<sup>ASS</sup>, where cleavage to the 33 kDa fragment occurs, do not affect proteolysis. The 33 kDa fragment obtained from PdeC<sup>ASS</sup> is approximately 2 kDa larger than the TM2+EAL fragment (see Fig. 5A), which places the putative cleavage site that leads to the formation of the 33 kDa fragment approximately between amino acids 211 and 222. Single amino acids exchanges in and around this region were introduced into PdeC<sup>ASS</sup> and the gene products were visualized by immunoblot analysis of overnight samples grown in LB at 28°C.

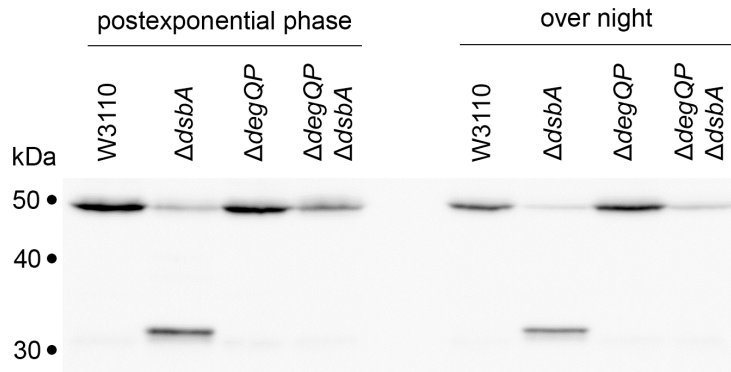

**Figure S7. The PdeC<sup>wt</sup>-derived 33 kDa processed fragment in a *dsbA* mutant is generated by DegP/DegQ.** Derivatives of strain W3110 carrying mutations in *dsbA*, *degP* and *degQ* as indicated and expressing PdeC<sup>wt</sup> from pCAB18-derived plasmids were grown in LB medium at 28°C and samples were taken at OD<sub>578</sub> of 3.0 (postexponential phase) and from overnight cultures. PdeC and its 33 kDa degradation product were detected by immunoblotting (using His6 tag antibodies).

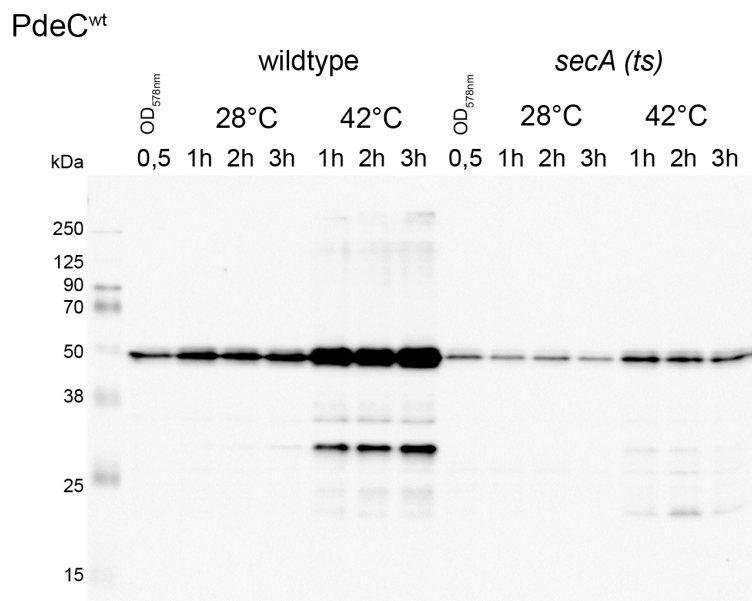

**Figure S8. TM1 of PdeC is not a cleavable signal sequence.** *E. coli* K-12 strain MC4100 and a temperature-sensitive *secA* mutant derivative expressing PdeC<sup>wt</sup> from the low copy number plasmic pCAB18 were grown in LB at 28°C to an OD<sub>578</sub> of 0.5, where the cultures were splitted with incubation continued at 28°C and 42°C. PdeC was detected by immunoblotting (with His6 tag antibodies) in samples taken after splitting of the cultures as indicated. Note that in the *secA*<sup>*ts*</sup> mutant, PdeC did not accumulate as a larger fragment after shift to 42°C as observed for exported proteins with cleaved signal sequences (Bassford et al., 1991; Oliver and Beckwith, 1981).

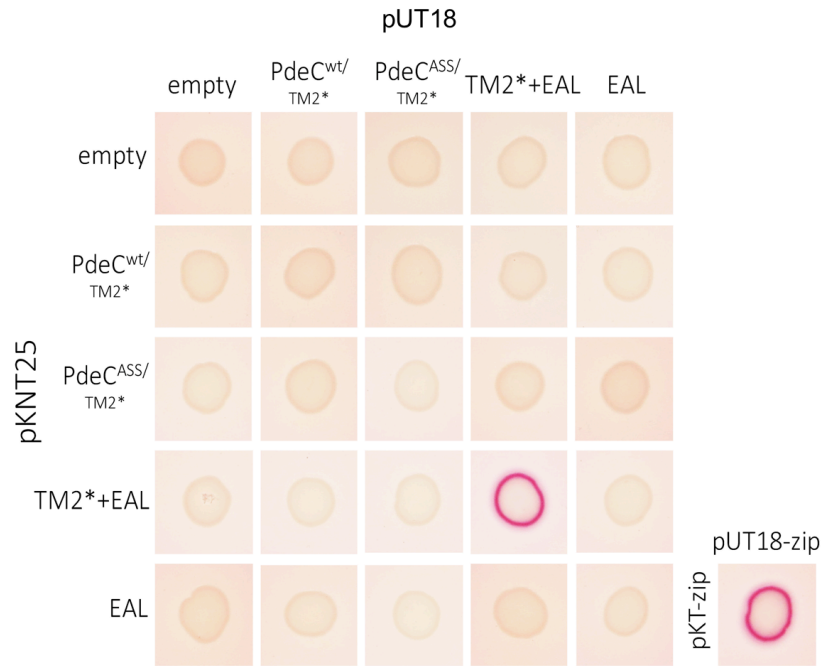

**Figure S9. Two-hybrid interaction assays with PdeC derivatives in which TM2 was precisely replaced by the second transmembrane segment of LacY (TM2\*).** Protein-protein interactions of the indicated PdeC variants carrying TM2\* instead of TM2 were tested using the bacterial adenylate cyclase-based two-hybrid system. The experiment was performed as the experiment with the corresponding PdeC constructs with the original TM2 region shown in Fig. 4C, with the exception that the agar plates used here contained 0.1 mM IPTG to also detect possible minor interactions. As a positive control, the leucine zipper part of the yeast GCN4 protein was used.

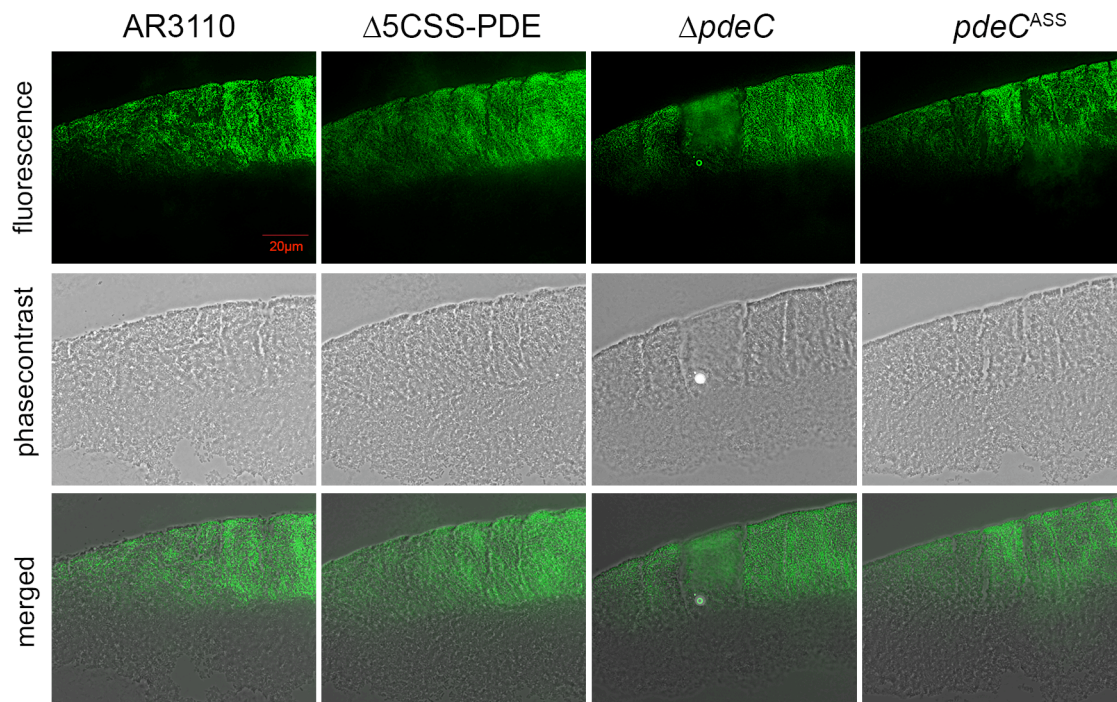

**Figure S10. Mutations in *pdeC* or multiple knockouts of genes encoding CSS domain PDEs do not affect matrix distribution or structure in the young outer rim areas of macrocolony biofilms.** Macrocolony biofilms of strain AR3110 and the indicated mutant derivatives were grown on salt-free LB containing Thioflavin S (as a matrix-specific fluorescent dye) for 5 d at 28°C. Vertical fixed cryosections through the outer rim areas of the macrocolonies were visualized by fluorescent microscopy and phasecontrast both separately and in the merged overlay as indicated.

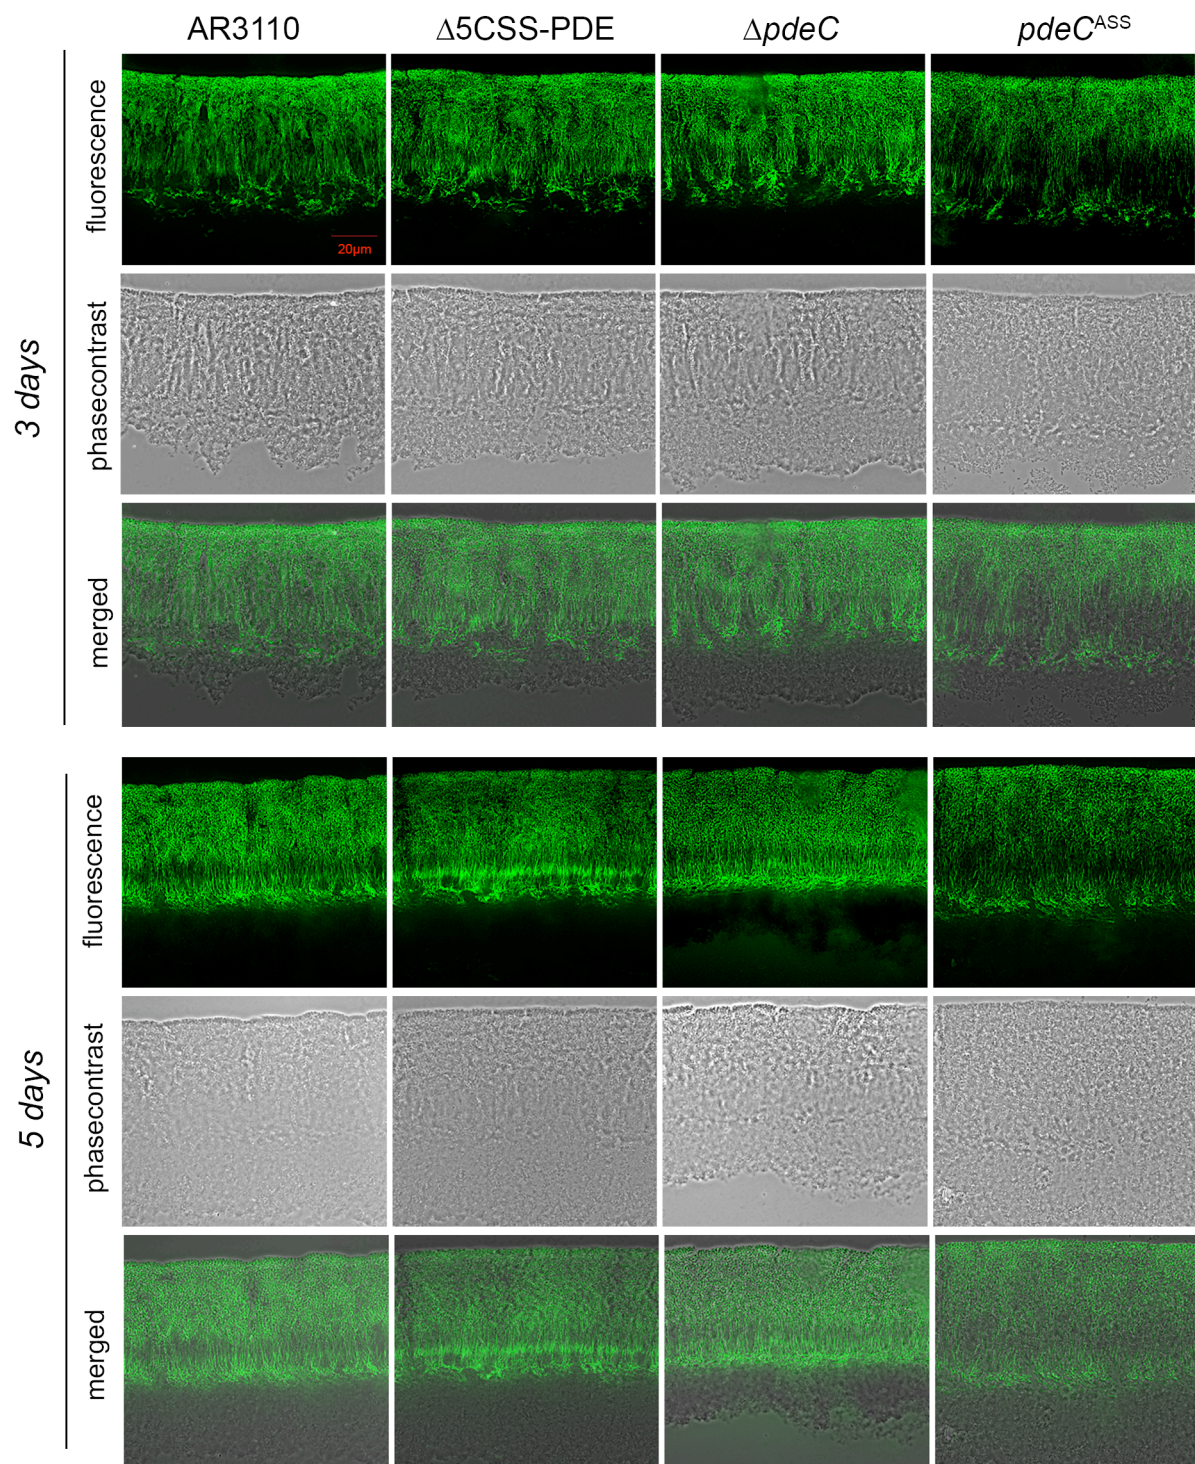

**Figure S11. CSS domain PDEs modulate matrix production and architecture in deeper zones of mature macrocolony biofilms.** This figure is a complete version of the experiment shown in Fig. 7, showing not only fluorescent images (as in Fig. 7), but also phase contrast and merged fluorescent/phase contrast images.



## Supplementary Tables

**Table S1. Oligonucleotides used in the present study.**

**I. Primers used for generating full ORF deletion/insertion mutants by one-step inactivation (OSI):**

|                        |                                                                                     |
|------------------------|-------------------------------------------------------------------------------------|
| OSI <i>dsbA</i> H1P1   | 5'- GAGTAGATCatgAAAAAGATTTGGCTGGCGCTGGCTGGTTTGTTTTAG<br>CGTGTAGGCTGGAGCTGCTTC -3'   |
| OSI <i>dsbA</i> H2P4   | 5'- GAATATTCACGGGCTTTATGTAATTTACATTGAAttaTTTTTCTCAT<br>TCCGGGGATCCGTCGACC -3'       |
| OSI <i>dsbB</i> H1P1   | 5'- GGTTTAAACTGCGCACTCTATGCATATTGCAGGGAAATGATTatgTT<br>GCGGTGTAGGCTGGAGCTGCTTC -3'  |
| OSI <i>dsbB</i> H2P4   | 5'- GCGGCAGGAAAAAGCGCTCCCGCAGGAGCGCCGAATGGAttaGCGA<br>CCATTCCGGGGATCCGTCGACC -3'    |
| OSI <i>dsbC</i> H1P1   | 5'- CACCCGCGGGCGTGATGTCTGAAAAGAACGGGAAGATTTatgAAGA<br>AAGGGTGTAGGCTGGAGCTGCTTC -3'  |
| OSI <i>dsbC</i> H2P4   | 5'- GACTTCACGGCGACGAAGTTGTATCTGTTGTTTCACGCGAAttaTTTAC<br>CATTCCGGGGATCCGTCGACC -3'  |
| OSI <i>dsbD</i> H1P1   | 5'- CACGGAGACACAGATTACCTCTCatgGCTCAACGCATCTTTACGCTGA<br>TCGTGTAGGCTGGAGCTGCTTC -3'  |
| OSI <i>dsbD</i> H2P4   | 5'- CACGTTGCACGCTATTTTCTCCGCTTTTCCCACTGCAAGTGTCGTtca<br>ATTCCGGGGATCCGTCGACC -3'    |
| OSI <i>dsbG</i> H1P1   | 5'- CAGTGATAGGTTatgCCTTTTACTCGACTTTTGCCTGACTGAAAAG<br>GACGTGTAGGCTGGAGCTGCTTC -3'   |
| OSI <i>dsbG</i> H2P4   | 5'- CTTttaTTTATTCCCCATAATGATATTAAGCGTTTTTCTGATCGGGCAAC<br>CATTCCGGGGATCCGTCGACC -3' |
| OSI <i>degP</i> H1P1   | 5'- GAAGAACACAGCAATTTTGCCTTATCTGTTAATCGAGACTGAAATAC<br>atgGTGTAGGCTGGAGCTGCTTC -3'  |
| OSI <i>degP</i> H2P4   | 5'- GTAAGGAGAACCCCTTCCCGTTTTTCAGGAAGGGGTTGAGGGAGAttaC<br>TGATTCCGGGGATCCGTCGACC -3' |
| OSI <i>degQ</i> H1P1   | 5'- CTGTTTTGAATCTCTTTTCTTATCATTTCAGGTACGAGAGCAGGAATA<br>atgGTGTAGGCTGGAGCTGCTTC -3' |
| OSI <i>degQ</i> H2P4   | 5'- CGGACATCACACGTAAGCCTGATGCCCGTTTACGACAttaACGCATC<br>AGATTCCGGGGATCCGTCGACC -3'   |
| OSI <i>cya</i> H1P1    | 5'-GATGTTGGCGGAATCACAGTCATGACGGGTAGCAAATCAGGCGATA<br>CGTCGTGTAGGCTGGAGCTGCTTC-3'    |
| OSI <i>cya</i> H2P4    | 5'-CCGCTAAGATTGCATGCCGGATAAGCCTCGCTTTCCGGCACGTTTAC<br>ATTCCGGGGATCCGTCGACC-3'       |
| OSI <i>lacI-A</i> H1P1 | 5'-TACGTTGACACCATCGAATGGCGCAAACCTTTCGTGTAGGCT<br>GGAGCTGCTTCG-3'                    |
| OSI <i>lacI-A</i> H2P4 | 5'-CCCTGCGTTTTTGCACCAGTACGTTTTTCCGCAGCTGTGATTCCGG<br>GGATCCGTCGACC-3'               |

**II. Primers used to construct the chromosomal *pdeC<sup>ASS</sup>* allele by two-step-mutagenesis:**

|                                    |      |                                                                                   |
|------------------------------------|------|-----------------------------------------------------------------------------------|
| <i>pdeC<sup>ASS</sup></i><br>pKD45 | H1P1 | 5'-CAGGGTTTTACCTTGAATGGCCGGGTATAAACAGGCAGGAAATTGAT<br>AGCGCATCGTGGCCGGATCTTGC-3'  |
| <i>pdeC<sup>ASS</sup></i><br>pKD45 | H2P2 | 5'CAGGCTGTGCGCCAGCTCGATGATGTGTTCCGCAATCAAATGACTGG<br>TTTTGCGGATAACAGAAAGGCCGGG-3' |

**III. Primers used for constructing pCAB18 derivatives that express PdeC variants or fragments with C-terminal His6-tags<sup>1</sup>:**

|                                 |                                                                                  |
|---------------------------------|----------------------------------------------------------------------------------|
| <i>pdeC</i> fwd EcoRI           | 5'- GACGAATTCATGAGTCATCGTGCACGACAC -3'                                           |
| <i>pdeC</i> rev HindIII         | 5'- GACAAGCTTTTATTGCCCGCGCGTAACTC -3'                                            |
| <i>pdeC</i> rev 6HIS HindIII    | 5'-GACAAGCTTTTAGTGATGGTGATGGTGATGTT<br>GCCCGCGCGTAACTC -3'                       |
| <i>pdeC</i> fwd 6HIS<br>TM2+EAL | 5'- GACGAATTCATGCATCACCATCACCATCACTCATATC<br>AACGTCTTATAACCCATTTTAT -3'          |
| <i>pdeC</i> fwd 6HIS EAL        | 5'- GACGAATTCATGAGTCATCACCATCACCATCACCCGCCG<br>CGTATTCGACAAAACACTATTTATCTCCC -3' |
| <i>pdeN</i> rev 6HIS Sall       | 5'- GACGTCGACTTAGTGATGGTGATGGTGATGCCACTGCGGCG<br>TATACGG -3'                     |
| <i>pdeC/N</i> Fusion fwd        | 5'- CTATTACTCTGGCTACGTATGCGCCCCGGCA -3'                                          |
| <i>pdeC/N</i> Fusion rev        | 5'- TGCCGGGGCGCATACGTAGCCAGAGTAATAG -3'                                          |

**IV. Primers used for introducing mutations into PdeC expressed from pCAB18 derivatives<sup>2</sup>:**

|                       |                                            |
|-----------------------|--------------------------------------------|
| <i>pdeC</i> fwd ASS   | 5'-GATAACCATTTTTTAGCCTCATCGCTGATAGC-3'     |
| <i>pdeC</i> rev ASS   | 5'-GCTATCAGCGATGAGGCTAAAAAATGGTTATC-3'     |
| <i>pdeC</i> fwd C75A  | 5'-GGGGCAAGTTGCCACTCCAGCCCATCAAAGC-3'      |
| <i>pdeC</i> rev C75A  | 5'-GCTTTTGATGGGCTGGAGTGGCAACTTGCCCC -3'    |
| <i>pdeC</i> fwd AAL   | 5'-GTATCGGCGCTGCAGCGTTGTTACGTTGGC-3'       |
| <i>pdeC</i> rev AAL   | 5'-GCCAACGTAACAACGCTGCAGCGCCGATAC-3'       |
| <i>pdeC</i> fwd V207F | 5'-GGATTTAACCITCCAAAGAAATGGCTATTTATATG-3'  |
| <i>pdeC</i> rev V207F | 5'-CATATAAATAGCCATTTCTTTGGAAGGTTAAATCC-3'  |
| <i>pdeC</i> fwd Q208F | 5'-GGATTTAACCGTAGCAAGAAATGGCTATTTATATG-3'  |
| <i>pdeC</i> rev Q208F | 5'-CATATAAATAGCCATTTCTTGCTACGGTTAAATCC-3'  |
| <i>pdeC</i> fwd G211A | 5'-GGATTTAACCGTACAAAGAAATGCCTATTTATATG-3'  |
| <i>pdeC</i> rev G211A | 5'-CATATAAATAGGCATTTCTTTGTACGGTTAAATCC-3'  |
| <i>pdeC</i> fwd Y214A | 5'-GCTATTTAGCTGCGACAGTTTATTCGACAAAACG-3'   |
| <i>pdeC</i> rev Y214A | 5'-CGTTTTGTTCGAATAAACTGTTCGCAGCTAAATAGC-3' |
| <i>pdeC</i> fwd A215F | 5'-GCTATTTATATTTACAGTTTATTCGACAAAACG-3'    |
| <i>pdeC</i> rev A215F | 5'-CGTTTTGTTCGAATAAACTGTGAAATATAAATAGC-3'  |
| <i>pdeC</i> fwd T216A | 5'-GCTATTTATATGCGGCAGTTTATTCGACAAAACG-3'   |
| <i>pdeC</i> rev T216A | 5'-CGTTTTGTTCGAATAAACTGCCGCATATAAATAGC-3'  |
| <i>pdeC</i> fwd V217F | 5'-GCTATTTATATGCGACATTTTATTCGACAAAACG-3'   |
| <i>pdeC</i> rev V217F | 5'-CGTTTTGTTCGAATAAAATGTTCGCATATAAATAGC-3' |
| <i>pdeC</i> fwd Y218A | 5'-GCTATTTATATGCGACAGTTGCTTCGACAAAACG-3'   |
| <i>pdeC</i> rev Y218A | 5'-CGTTTTGTTCGAAGCAACTGTTCGCATATAAATAGC-3' |
| <i>pdeC</i> fwd K221A | 5'-GTTTATTCGACAGCACGCCCAATTGCAGCCATTG-3'   |
| <i>pdeC</i> rev K221A | 5'-CAATGGCTGCAATTGGGCGTGCTGTTCGAATAAAC-3'  |
| <i>pdeC</i> fwd R222A | 5'-GTTTATTCGACAAAAGCCCCAATTGCAGCCATTG-3'   |
| <i>pdeC</i> rev R222A | 5'-CAATGGCTGCAATTGGGGCTTTTGTTCGAATAAAC-3'  |

**V. Primers used for constructing bacterial two-hybrid plasmids on the basis of the pKNT25 and pUT18 vectors (Karimova et al., 1998) that express PdeC or PdeC fragments fused to the two separate CyaA domains T25 and T18<sup>3</sup>:**

<sup>1</sup> Restriction sites are indicated by **boldface**.

<sup>2</sup> Mutations introduced are indicated by *italics*.

a. External cloning primers:

|                                         |                                       |
|-----------------------------------------|---------------------------------------|
| <i>pdeC<sup>wt</sup></i> -XbaI-for      | 5`-CCGTCTAGAGAGTCATCGTGCACGACACC-3`   |
| <i>pdeC<sup>ASS</sup></i> -XbaI-for     | 5`-CCGTCTAGAGAGTCATCGTGCACGACACC-3`   |
| <i>pdeC<sup>TM2+EAL</sup></i> -XbaI-for | 5`-CCGTCTAGAGCTTATAACCCATTTTTATA-3`   |
| <i>pdeC<sup>EAL</sup></i> -XbaI-for     | 5`-CCGTCTAGAGCGTATTCGACAAAACACTATT-3` |
| <i>pdeC</i> -SmaI-rev                   | 5`-TTTCCCGGGGTTGCCCGCGGCTTAACCTCC-3`  |

b. Primers introducing TM2\*<sup>4</sup>:

|                                         |                                                                                                                  |
|-----------------------------------------|------------------------------------------------------------------------------------------------------------------|
| TM2*-rev                                | 5`- <u>GGAATAATAGCGAGAACAGAGAAATAGCGGCCAAAATAATACCA</u><br>CGTTGATATGAAGTCGC-3`                                  |
| TM2*-for                                | 5`- <u>TCTGTTCTCGCTATTATTCCAACCGCTGTTTGGTCTGCTTTCTCGTA</u><br>TTCGACAAAACACTAT-3`                                |
| <i>pdeC<sup>TM2*EAL</sup></i> -XbaI-for | 5`-CCGTCTAGAGGGTATTATTTTTGCCGCTATTTCTCTGTTCTCGCTAT<br><u>TATCCAACCGCTGTTTGGTCTGCTTTCTCGTATTCGACAAAACACTAT-3`</u> |

VI. Synthetic DNA fragments encoding *PdeC* variants that were directly used for cloning into *pCAB18*<sup>5</sup> or for replacing larger segments in *pdeC* on *pCAB18*<sup>6</sup>:

|                             |                                                                                                                                                                                                                                                                                                                                                                                                                                                                                                                                                                                                                                                                                                                                                                                                                                                                                                                                                                                                                                                                                                                                                                        |
|-----------------------------|------------------------------------------------------------------------------------------------------------------------------------------------------------------------------------------------------------------------------------------------------------------------------------------------------------------------------------------------------------------------------------------------------------------------------------------------------------------------------------------------------------------------------------------------------------------------------------------------------------------------------------------------------------------------------------------------------------------------------------------------------------------------------------------------------------------------------------------------------------------------------------------------------------------------------------------------------------------------------------------------------------------------------------------------------------------------------------------------------------------------------------------------------------------------|
| <i>PdeC<sup>Δperi</sup></i> | 5`-<br>GACGAATT <b>Catg</b> AGTCATCGTGCACGACACCAATTACTGGCGTTGCCGGGCATTAT<br>CTTTTTAGTTCTCTTTCCCATCATTCTTTTCGCTATGGATTGCCTTCCTTTGGGCAAA<br>ATCAGAAGTGAATAATCAGCTCCGTCTTATAACCCATTTTTATAATCATCTTATTT<br>TTGCGTTGCCCGCCGGTATTTGGGGAGTCTTGTCTGCTATTACTCTGGCTACGT<br>ATTCGACAAAACACTATTTATCTCCCAAACGTAATTGCAACGCGCCCTCGAAAAAC<br>ATCAACTTTGTCTTTATTACCAGCCAATAATCGATATCAAAACAGAAAAATGTAT<br>CGGCGCTGAAGCGTTGTTACGTTGGCCTGGTGAGCAGGGGCAAATAATGAATCC<br>GGCAGAGTTTATCCGCTGGCAGAAAAGGAGGGGATGATAGAACAGATAACTGA<br>TTATGTTATTGATAATGTCTTCCGCGATCTGGGCGATTACCTGGCAACACATGCA<br>GATCGCTATGTTTCTATTAACCTGTCGGCCTCCGATTTTCATACGTCACGGTTGAT<br>AGCGCGAATCAATCAGAAAACAGAGCAATACGCGGTGCGTCCGCAGCAAATTA<br>ATTTGAAGTGACTGAGCATGCATTTCTTGATGTTGACAAAATGACGCCGATTATT<br>CTGGCTTTCCGCCAGGCAGGTTACGAAGTGGCAATTGATGATTTTGGTATTGGCT<br>ACTCTAACTTGCATAACCTTAAATCATTGAATGTCGATATTTTGAAAATCGACAA<br>ATCGTTTGTGAAACGCTGACCACCCACAAAACAGTCATTTGATTGCGGAACAC<br>ATCATCGAGCTGGCGCACAGCCTGGGGTTAAAAACGATCGCTGAAGGCGTCAA<br>ACTGAGGAGCAGGTTAACTGGCTGCGCAAACGCGGCGTGCCTATTGCCAGGGA<br>TGGTTCTTTGCGAAGGCGATGCCGCCGAGGTGTTTATGCAATGGATGGAGCAAT<br>TACCCGCGCGGGAGTTAACGCGCGGGCAAATAAAAGCTT <b>GTC</b> -3` |
| <i>PdeC</i> TM1*/TM2*       | 5`-<br><b>GAATT</b> <b>Catg</b> AGTCATCGTGCACGACACAACCTTTTGGATGTTTCGGTTTATTCTTTTTT<br>TTTTACTTTTTTATCATGGGAGCCTACTTCCCGTTTTTCCCGATTGGCTAAAATC<br>AGAAGTGAATAATCAGCTCCGAACCTTTGCTCAACTGGCACTGGATAAATCCGA<br>GCTGGTCATTCGCCAGGCAGATTTAGTGAGCGATGCAGCTGAACGCTATCAGGG<br>GCAAGTTTGCCTCCAGCCATCAAAGCGAATGTTGAATATTATTCGTGGCTAT<br>CTTTATATTAATGAATTGATCTATGCCCGTGATAACCATTTTTTATGCTCATCGCT<br>GATAGCGCCTGTAACGGCTATACGATTGCACCGGCCGATTATAAGCGTGAACC<br>TAACGTTTCTATCTATTATTACCGCGATACGCCTTTTTTCTCTGGCTATAAAATGA                                                                                                                                                                                                                                                                                                                                                                                                                                                                                                                                                                                                                                                             |

<sup>3</sup> Restriction sites are indicated by **boldface**.

<sup>4</sup> Sequence parts encoding TM2\* are indicated by *italics*; sequences complementary on TM2\*-rev and TM2\*-for are *underlined*; sequences complementary on TM2\*-rev and *pdeC<sup>TM2\*EAL</sup>*-XbaI-for are shown in **blue**.

<sup>5</sup> Restriction sites are indicated by **boldface**.

<sup>6</sup> Restriction sites are indicated by **boldface**, mutations introduced are indicated by *italics*.

|                       |                                                                                                                                                                                                                                                                                                                                                                                                                                                                                                                                                                                                                                                                                                                                                                                                                                                                                                                                                                                                                                                                                                                                                                                                                                                                                                                                                                                                                                                                                                              |
|-----------------------|--------------------------------------------------------------------------------------------------------------------------------------------------------------------------------------------------------------------------------------------------------------------------------------------------------------------------------------------------------------------------------------------------------------------------------------------------------------------------------------------------------------------------------------------------------------------------------------------------------------------------------------------------------------------------------------------------------------------------------------------------------------------------------------------------------------------------------------------------------------------------------------------------------------------------------------------------------------------------------------------------------------------------------------------------------------------------------------------------------------------------------------------------------------------------------------------------------------------------------------------------------------------------------------------------------------------------------------------------------------------------------------------------------------------------------------------------------------------------------------------------------------|
|                       | <p>CCTATATGAGCGGGGAAATTATGTGGCGGTTATCAACCCTCTCTTCTGGAGTGAA<br/> GTGATGTCTGATGACCCGACATTGCAATGGGGTGTGTATGATACGGTGACGAAA<br/> ACTTTTTCTCGTTAAGCAAAGAGGCCTCGGCAGCAACGTTTTCTCCGCTGATTC<br/> ATTTGAAGGATTTAACCGTACAAAGAAATGGCTATTTATATGCGACAGTTTATC<br/> GACAAAACGCCAATTGCAGCCATTGTTGCGACTTCATATCAACGTGGTATTATT<br/> TTTGCCGCTATTTCTCTGTTCTCGCTATTATTCCAACCGCTGTTTGGTCTGCTTCT<br/> CGTATTCGACAAAACCTATTTATCTCCCAAACGTAATTGCAACGCGCCCTCGAAA<br/> AACATCAACTTTGTCTTTATTACCAGCCAATAATC <b>GATATC</b>-3'</p>                                                                                                                                                                                                                                                                                                                                                                                                                                                                                                                                                                                                                                                                                                                                                                                                                                                                                                                                                                                                          |
| PdeC <sup>EALΔC</sup> | <p>5'-<br/> AACGGCTATACGATTGCAC<b>CGGCCG</b>GATTATAAGCGTGAACCTAACGTTTCTATC<br/> TATTATTACCGGATACGCCTTTTTTCTCTGGCTATAAAATGACCTATATGCAGCG<br/> GGGAAATTATGTGGCGGTTATCAACCCTCTCTTCTGGAGTGAAGTGATGTCTGAT<br/> GACCCGACATTGCAATGGGGTGTGTATGATACGGTGACGAAAACTTTTTCTCGT<br/> TAAGCAAAGAGGCCTCGGCAGCAACGTTTTTCTCCGCTGATTCATTTGAAGGATTT<br/> AACCGTACAAAGAAATGGCTATTTATATGCGACAGTTTATTCGACAAAACGCC<br/> AATTGCAGCCATTGTTGCGACTTCATATCAACGTCTTATAACCCATTTTTATAATC<br/> ATCTTATTTTTGCGTTGCCCGCGGTATTTGGGGAGTCTTGTTCTGCTATTACTC<br/> TGGCTACGTATTCGACAAAACCTATTTATCTCCCAAACGTAATTGCAACGCGCCC<br/> TCGAAAAACATCAACTTAGTCTTTATTACCAGCCAATAATCGATATCAAAACAGA<br/> AAAAAGTATCGGCGCTGAAGCGTTGTTACGTTGGCCTGGTGAGCAGGGGCAAT<br/> AATGAATCCGGCAGAGTTTATTCCGCTGGCAGAAAAGGAGGGGATGATAGAACA<br/> GATAACTGATTATGTTATTGATAATGTCTTCCGCGATCTGGGCGATTACCTGGCA<br/> ACACATGCAGATCGCTATGTTTCTATTAACCTGTCGGCCTCCGATTTTCATACGTC<br/> ACGGTTGATAGCGGAATCAATCAGAAAACAGAGCAATACGCGGTGCGTCCGCA<br/> GCAAATTAATTTGAAGTGAAGTACTGAGCATGCATTTCTTGATGTTGACAAAATGACG<br/> CCGATTATTCTGGCTTTCCGCCAGGCAGGTTACGAAGTGGCAATTGATGATTTTG<br/> GTATTGGCTACTCTAACTTGCATAACCTTAAATCATTGAATGTCGATATTTGAA<br/> AATCGACAAATCGTTTGTGAAACGCTGACCACCCACAAAACAGTCATTTGATT<br/> GCGGAACACATCATCGAGCTGGCGCACAGCCTGGGGTTAAAAACGATCGCTGAA<br/> GGCGTCGAAACTGAGGAGCAGGTTAACTGGCTGCGCAAAACGCGGCGTGCCTAT<br/> AGCCAGGGATGGTTCTTTGCGAAGGCGATGCCGCCGAGGTGTTTATGCAATGGA<br/> TGGAGCAATTACCCGCGCGGGAGTTAACGCGCGGGCAACATCACCATCACCATC<br/> AC<sub>taa</sub><b>AAGCTT</b>GTGC-3'</p> |

## Supplementary References

- Barembuch, C and Hengge, R (2007) Cellular levels and activity of the flagellar sigma factor FliA of *Escherichia coli* are controlled by FlgM-modulated proteolysis. *Mol Microbiol* 65: 76-89.
- Bassford, P, Beckwith, J, Ito, K, Kumamoto, C, Mizushima, S, Oliver, D, Randall, L, Silhavy, TJ, Tai, PC and Wickner, B (1991) The primary pathway of protein export in *E. coli*. *Cell* 65: 367-368.
- Corpet, F (1988) Multiple sequence alignment with hierarchical clustering. *Nucl Acids Res* 16: 10881-10890.
- Datsenko, KA and Wanner, BL (2000) One-step inactivation of chromosomal genes in *Escherichia coli* K-12 using PCR products. *Proc Nat Acad Sci USA* 97: 6640-6645.
- Hayashi, K, Morooka, N, Yamamoto, Y, Fujita, K, Isono, K, Choi, S, Ohtsubo, E, Baba, T, Wanner, BL, Mori, H and Horiuchi, T (2006) Highly accurate genome sequences of *Escherichia coli* K-12 strains MG1655 and W3110. *Mol Syst Biol* 2: 2006.0007.
- Hebbeln, P, Rodionov, DA, Alfandega, A and Eitinger, T (2007) Biotin uptake in prokaryotes by solute transporters with an optional ATP-binding cassette-containing module. *Proc Natl Acad Sci USA* 104: 2909-2914.
- Hufnagel, DA, DePas, WH and Chapman, M (2014) The disulfide bonding system suppresses CsgD-independent cellulose production in *Escherichia coli*. *J Bacteriol* 196: 3690-3699.
- Inagaki, S, Ghirlando, R and Grisshammer, R (2013) Biophysical characterization of membrane proteins in nanodiscs. *Methods Enzymol* 59: 287-300.
- Karimova, G, Pidoux, J, Ullmann, A and Ladant, D (1998) A bacterial two-hybrid system based on a reconstituted signal transduction pathway. *Proc Natl Acad Sci USA* 95: 5752-5756.
- Kolmsee, T and Hengge, R (2011) Rare codons play a positive role in the expression of the stationary phase sigma factor RpoS ( $\sigma^S$ ) in *Escherichia coli*. *RNA Biol* 8: 913-921.
- Lange, R and Hengge-Aronis, R (1994) The cellular concentration of the  $\sigma^S$  subunit of RNA-polymerase in *Escherichia coli* is controlled at the levels of transcription, translation and protein stability. *Genes Dev* 8: 1600-1612.
- Lindenberg, S, Klauck, G, Pesavento, C, Klauck, E and Hengge, R (2013) The EAL domain phosphodiesterase YciR acts as a trigger enzyme in a c-di-GMP signaling cascade in *E. coli* biofilm control. *EMBO J* 32: 2001-2014.
- Miller, JH (1972) *Experiments in molecular genetics*. Cold Spring Harbor Laboratory, Cold Spring Harbor, N. Y.
- Oliver, DB and Beckwith, J (1981) *Escherichia coli* mutant pleiotropically defective in the export of secreted proteins. *Cell* 25: 765-772.
- Pesavento, C, Becker, G, Sommerfeldt, N, Possling, A, Tschowri, N, Mehli, A and Hengge, R (2008) Inverse regulatory coordination of motility and curli-mediated adhesion in *Escherichia coli*. *Genes Dev* 22: 2434-2446.
- Ritchie, TK, Grinkova, YV, Bayburt, TH, Denisov, IG, Zolnerciks, JK, Atkins, WM and Sligar, SG (2009) Chapter 11 - Reconstitution of membrane proteins in phospholipid nanodiscs. *Methods Enzymol* 464: 211-231.
- Russel, M and Model, P (1982) Filamentous phage pre-coat is an integral membrane protein: analysis by a new method of membrane preparation. *Cell* 28: 177-184.
- Serra, DO and Hengge, R (2017) Experimental detection and visualization of the extracellular matrix in macrocolony biofilms. In *c-di-GMP Signaling: Methods & Protocols - Methods in Molecular Biology*, Sauer, K (ed.), pp. 133-145. Humana Press, Springer Nature, New York, N.Y.

- Serra, DO, Richter, AM, Klauck, G, Mika, F and Hengge, R (2013) Microanatomy at cellular resolution and spatial order of physiological differentiation in a bacterial biofilm. *mBio* 4(2): e00103-13.
- Sommerfeldt, N, Possling, A, Becker, G, Pesavento, C, Tschowri, N and Hengge, R (2009) Gene expression patterns and differential input into curli fimbriae regulation of all GGDEF/EAL domain proteins in *Escherichia coli*. *Microbiology* 155: 1318-1331.
- Weber, H, Pesavento, C, Possling, A, Tischendorf, G and Hengge, R (2006) Cyclic-di-GMP-mediated signaling within the  $\sigma^S$  network of *Escherichia coli*. *Mol Microbiol* 62: 1014-1034.
